# Supplementary material for: Engineering Terpene Production Pathways in Methylobacterium extorquens AM1
Source: MDPI journal article supplement (doi:10.3390/microorganisms12030500), 2024-02-29
Supplement: s1 [file s1]

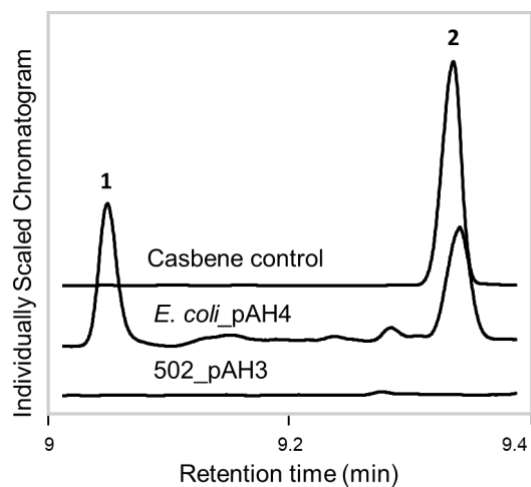

**Supplemental Figure S1: GC-FID confirmation of casbene production.** Extracts from *E. coli* and *M. extorquens* casbene sample chromatograms are compared to a positive sample. The *E. coli* samples from the constitutive promoter when compared to a casbene standard (2) show success of the system at retention time of 9.35. (1), Geranylgeraniol, product of unspecific phosphatase activity from geranylgeranyl diphosphate.
